# Supplementary material for: Genome-Wide Identification and Evolution of Receptor-Like Kinases (RLKs) and Receptor like Proteins (RLPs) in Brassica juncea
Source: PubMed Central journal article supplement (PMC7823396; doi:10.3390/biology10010017), 2020-12-30
Supplement: biology-10-00017-s001.pdf [file biology-10-00017-s001.pdf]

Supplementary Materials

# Genome-Wide Identification and Evolution of Receptor-Like Kinases (RLKs) and Receptor like Proteins (RLPs) in *Brassica juncea*

Hua Yang, Philipp E. Bayer, Soodeh Tirnaz, David Edwards and Jacqueline Batley

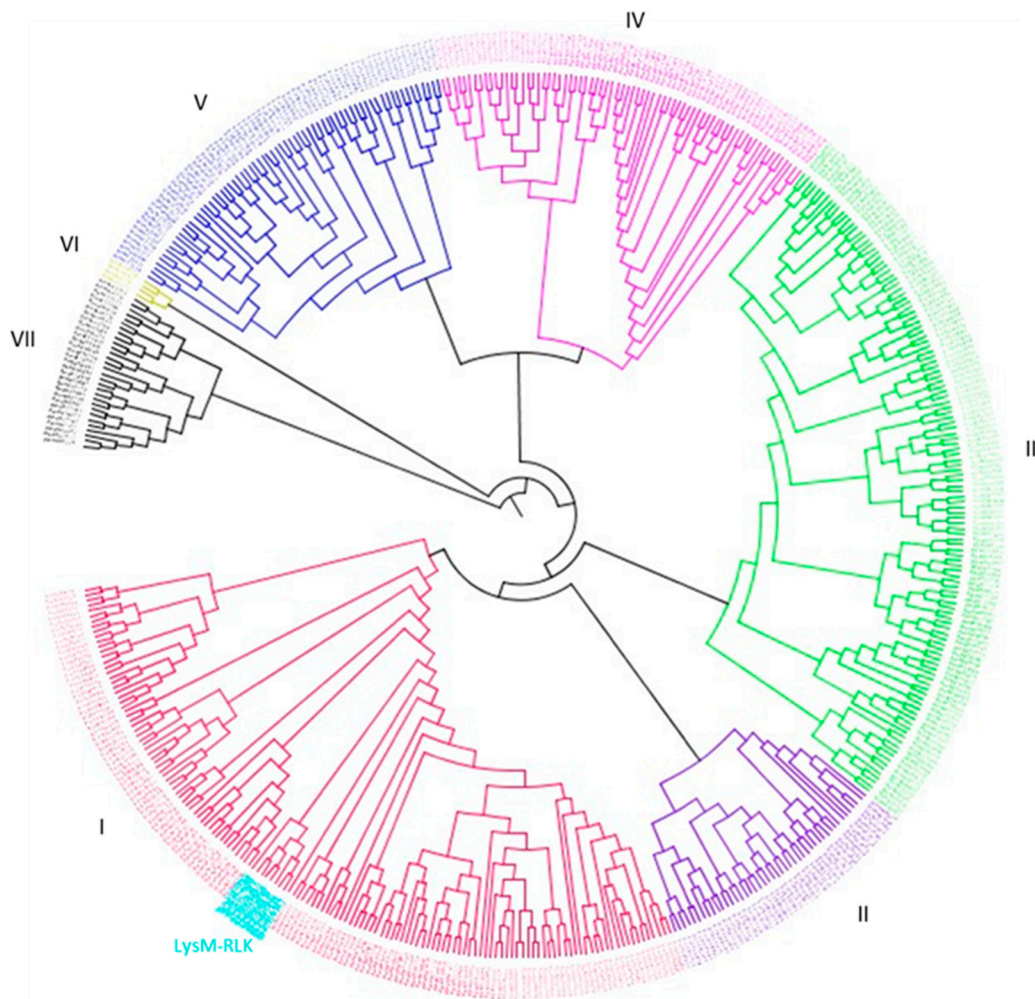

**Figure S1.** Phylogenetic analysis of RLK proteins of *B. juncea*. The circular tree was generated based on the neighbour-joining method using Geneious v7.1.9 software. These genes were divided into 7 main groups by different colours. In Group I, labels highlighted with light-blue were LysM-RLK genes.

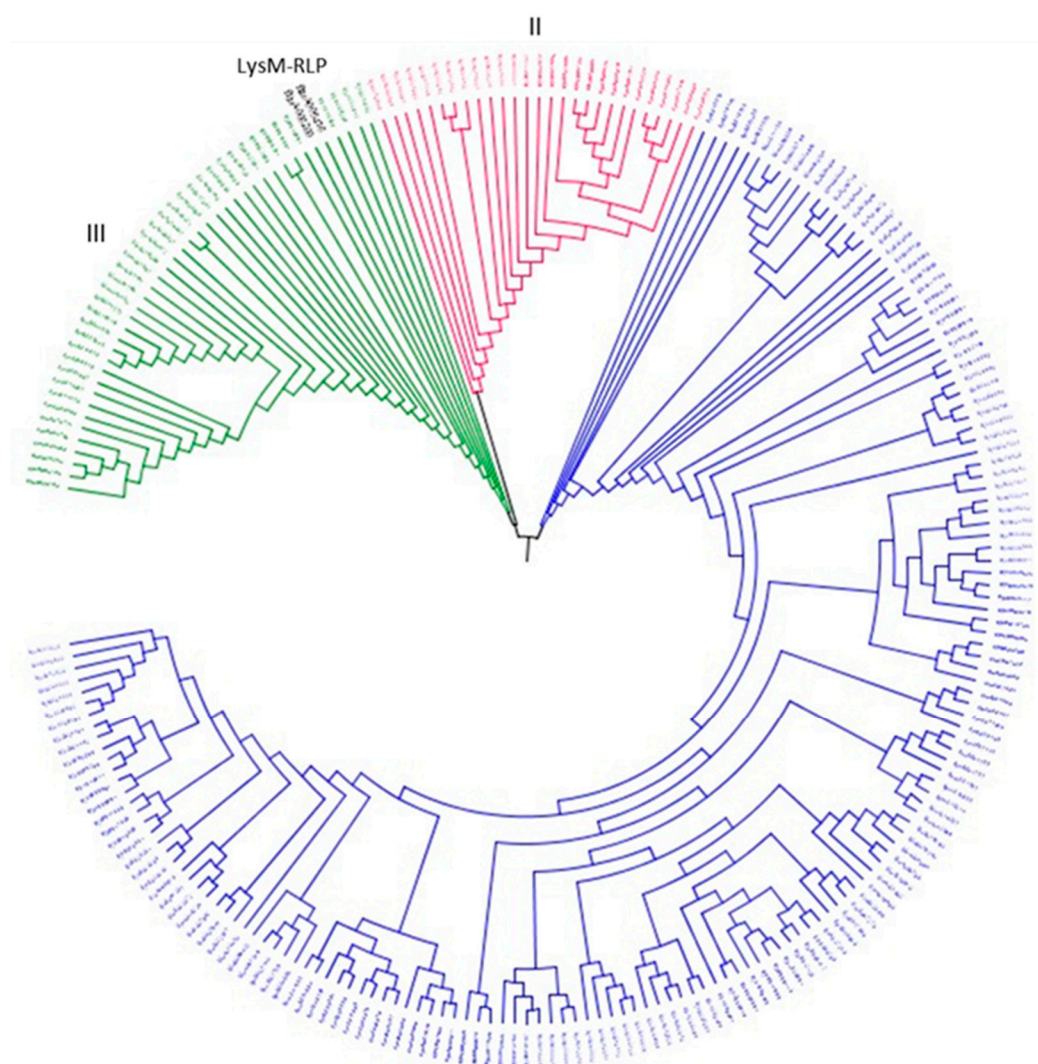

**Figure S2.** Phylogenetic analysis of RLP proteins of *B. juncea*. The circular tree was generated based on the neighbour-joining method using Geneious v7.1.9 software. These genes were divided into 3 main groups by different colours. In Group III, labels highlighted with black were LysM-RLP genes.

**Table S1.** The distribution and organisation of candidate RLK genes in *B. juncea*.

| Chromosome                | Total                    | LysM-RLK                 | LRR-RLK                  | No. of gene cluster (tandem cluster) | No. of gene in clusters |                        |                         | No. of duplicated genes  |                        |                          | No. of duplicated genes in clusters |          |         | Tandem duplication genes | Segmental duplication genes | Duplication type |               |   |
|---------------------------|--------------------------|--------------------------|--------------------------|--------------------------------------|-------------------------|------------------------|-------------------------|--------------------------|------------------------|--------------------------|-------------------------------------|----------|---------|--------------------------|-----------------------------|------------------|---------------|---|
|                           |                          |                          |                          |                                      | Total (in each cluster) | LysM-RLK               | LRR-RLK                 | Total                    | LysM-RLK               | LRR-RLK                  | Total (tandem duplications)         | LysM-RLK | LRR-RLK |                          |                             | Intra-genomic    | Inter-genomic |   |
|                           |                          |                          |                          |                                      |                         |                        |                         |                          |                        |                          |                                     |          |         |                          |                             |                  |               |   |
| A genome <i>B. juncea</i> | A01                      | 30                       | 0                        | 30                                   | 1                       | 4 (4)                  | 0                       | 4                        | 25                     | 0                        | 25                                  | 3        | 0       | 3                        | 0                           | 0                | ✓             | ✓ |
|                           | A02                      | 25                       | 0                        | 25                                   | 2 (1)                   | 6 (3+3)                | 0                       | 6                        | 19                     | 0                        | 19                                  | 3 (2)    | 0       | 3                        | 4                           | 0                | ✓             | ✓ |
|                           | A03                      | 29                       | 0                        | 29                                   | 1 (1)                   | 3 (3)                  | 0                       | 3                        | 25                     | 0                        | 25                                  | 2 (2)    | 0       | 2                        | 2                           | 0                | ✓             | ✓ |
|                           | A04                      | 16                       | 2                        | 14                                   | 0                       | 0                      | 0                       | 0                        | 15                     | 2                        | 13                                  | 0        | 0       | 0                        | 2                           | 0                | ✓             | ✓ |
|                           | A05                      | 22                       | 1                        | 21                                   | 1                       | 4 (4)                  | 0                       | 4                        | 21                     | 0                        | 21                                  | 4        | 0       | 4                        | 0                           | 2                | ✓             | ✓ |
|                           | A06                      | 31                       | 1                        | 30                                   | 2 (1)                   | 7 (4+3)                | 1                       | 6                        | 29                     | 1                        | 28                                  | 7 (2)    | 1       | 6                        | 12                          | 4                | ✓             | ✓ |
|                           | A07                      | 26                       | 0                        | 26                                   | 0                       | 0                      | 0                       | 0                        | 22                     | 0                        | 22                                  | 0        | 0       | 0                        | 0                           | 2                | ✓             | ✓ |
|                           | A08                      | 12                       | 1                        | 11                                   | 0                       | 0                      | 0                       | 0                        | 11                     | 1                        | 10                                  | 0        | 0       | 0                        | 0                           | 0                | ✓             | ✓ |
|                           | A09                      | 23                       | 0                        | 23                                   | 1                       | 3 (3)                  | 0                       | 3                        | 22                     | 0                        | 22                                  | 3        | 0       | 3                        | 0                           | 0                | ✓             | ✓ |
|                           | A10                      | 22                       | 0                        | 22                                   | 2                       | 6 (3+3)                | 0                       | 6                        | 20                     | 0                        | 20                                  | 5        | 0       | 5                        | 2                           | 0                | ✓             | ✓ |
| Total                     | 236, 51.53% <sup>1</sup> | 5                        | 231                      | 10 (3)                               | 33                      | 1                      | 32                      | 209                      | 4                      | 205                      | 27 (6)                              | 1        | 26      | 22                       | 8                           | -                | -             |   |
| B genome <i>B. juncea</i> | B01                      | 27                       | 2                        | 25                                   | 0                       | 0                      | 0                       | 0                        | 26                     | 2                        | 24                                  | 0        | 0       | 0                        | 2                           | 0                | ✓             | ✓ |
|                           | B02                      | 36                       | 0                        | 36                                   | 1                       | 5 (5)                  | 0                       | 5                        | 34                     | 0                        | 34                                  | 5        | 0       | 5                        | 0                           | 2                | ✓             | ✓ |
|                           | B03                      | 30                       | 0                        | 30                                   | 1                       | 4 (4)                  | 0                       | 4                        | 26                     | 0                        | 26                                  | 3        | 0       | 3                        | 6                           | 2                | ✓             | ✓ |
|                           | B04                      | 30                       | 1                        | 29                                   | 1                       | 6 (6)                  | 0                       | 6                        | 25                     | 1                        | 24                                  | 3        | 0       | 3                        | 10                          | 0                | ✓             | ✓ |
|                           | B05                      | 33                       | 0                        | 33                                   | 1 (1)                   | 6 (6)                  | 0                       | 6                        | 32                     | 0                        | 32                                  | 5 (4)    | 0       | 5                        | 8                           | 0                | ✓             | ✓ |
|                           | B06                      | 20                       | 0                        | 20                                   | 0                       | 0                      | 0                       | 0                        | 17                     | 0                        | 17                                  | 0        | 0       | 0                        | 0                           | 0                | ✓             | ✓ |
|                           | B07                      | 16                       | 0                        | 16                                   | 0                       | 0                      | 0                       | 0                        | 16                     | 0                        | 16                                  | 0        | 0       | 0                        | 0                           | 2                | ✓             | ✓ |
|                           | B08                      | 30                       | 0                        | 30                                   | 2 (2)                   | 8 (5+3)                | 0                       | 8                        | 28                     | 0                        | 28                                  | 8 (7)    | 0       | 8                        | 10                          | 2                | ✓             | ✓ |
|                           | Total                    | 222, 48.47% <sup>1</sup> | 3                        | 219                                  | 6 (3)                   | 29                     | 0                       | 29                       | 204                    | 3                        | 201                                 | 24 (11)  | 0       | 24                       | 36                          | 8                | -             | - |
| Total mapped RLK genes    | 458, 92.90% <sup>4</sup> | 8, 1.75% <sup>1</sup>    | 450, 98.25% <sup>1</sup> | 16 (6)                               | 62, 13.54% <sup>1</sup> | 1, 12.50% <sup>2</sup> | 61, 13.56% <sup>3</sup> | 413, 90.17% <sup>1</sup> | 7, 87.50% <sup>2</sup> | 406, 90.22% <sup>3</sup> | 51 (17)                             | 1        | 50      | 58                       | 16                          | -                | -             |   |
| Unassigned                | 35, 7.10% <sup>4</sup>   | 1                        | 34                       | -                                    | -                       | -                      | -                       | -                        | -                      | -                        | -                                   | -        | -       | -                        | -                           | -                | -             |   |
| Total                     | 493                      | 9, 1.83% <sup>4</sup>    | 484, 98.17% <sup>4</sup> | -                                    | -                       | -                      | -                       | -                        | -                      | -                        | -                                   | -        | -       | -                        | -                           | -                | -             |   |

<sup>1</sup> The proportion in all mapped RLK genes. <sup>2</sup> The proportion in all mapped LysM-RLK genes. <sup>3</sup> The proportion in all mapped LRR-RLK genes. <sup>4</sup> The proportion in all RLK genes.

**Table S2.** The distribution and organisation of candidate RLP genes in *B. juncea*.

| Chromosome                | Total                    | LysM-RLP                 | LRR-RLP                  | No. of gene cluster (tandem cluster) | No. of gene in clusters |          |                         | No. of duplicated genes  |                         |                          | No. of duplicated genes in clusters |          |         | Tandem duplication genes | Segmental duplication genes | Duplication type |               |   |
|---------------------------|--------------------------|--------------------------|--------------------------|--------------------------------------|-------------------------|----------|-------------------------|--------------------------|-------------------------|--------------------------|-------------------------------------|----------|---------|--------------------------|-----------------------------|------------------|---------------|---|
|                           |                          |                          |                          |                                      | Total                   | LysM-RLP | LRR-RLP                 | Total                    | LysM-RLP                | LRR-RLP                  | Total                               | LysM-RLP | LRR-RLP |                          |                             | Intra-genomic    | Inter-genomic |   |
|                           |                          |                          |                          |                                      |                         |          |                         |                          |                         |                          |                                     |          |         |                          |                             |                  |               |   |
| A genome <i>B. juncea</i> | A01                      | 12                       | 0                        | 12                                   | 0                       | 0        | 0                       | 7                        | 0                       | 7                        | 0                                   | 0        | 0       | 0                        | 0                           | ✓                | ✓             |   |
|                           | A02                      | 5                        | 0                        | 5                                    | 0                       | 0        | 0                       | 1                        | 0                       | 1                        | 0                                   | 0        | 0       | 0                        | 0                           | ×                | ✓             |   |
|                           | A03                      | 17                       | 0                        | 17                                   | 1 (1)                   | 3        | 0                       | 3                        | 10                      | 0                        | 10                                  | 3 (3)    | 0       | 3                        | 10                          | 0                | ✓             | ✓ |
|                           | A04                      | 9                        | 0                        | 9                                    | 0                       | 0        | 0                       | 5                        | 0                       | 5                        | 0                                   | 0        | 0       | 2                        | 0                           | ✓                | ✓             |   |
|                           | A05                      | 6                        | 0                        | 6                                    | 0                       | 0        | 0                       | 1                        | 0                       | 1                        | 0                                   | 0        | 0       | 0                        | 0                           | ✓                | ✓             |   |
|                           | A06                      | 7                        | 1                        | 6                                    | 0                       | 0        | 0                       | 4                        | 1                       | 3                        | 0                                   | 0        | 0       | 0                        | 0                           | ×                | ✓             |   |
|                           | A07                      | 11                       | 0                        | 11                                   | 1 (1)                   | 3        | 0                       | 3                        | 7                       | 0                        | 7                                   | 2 (2)    | 0       | 2                        | 2                           | 0                | ✓             | ✓ |
|                           | A08                      | 8                        | 0                        | 8                                    | 1 (1)                   | 4        | 0                       | 4                        | 7                       | 0                        | 7                                   | 4 (3)    | 0       | 4                        | 12                          | 0                | ✓             | ✓ |
|                           | A09                      | 17                       | 0                        | 17                                   | 0                       | 0        | 0                       | 9                        | 0                       | 9                        | 0                                   | 0        | 0       | 2                        | 0                           | ✓                | ✓             |   |
|                           | A10                      | 3                        | 0                        | 3                                    | 0                       | 0        | 0                       | 1                        | 0                       | 1                        | 0                                   | 0        | 0       | 0                        | 0                           | ✓                | ×             |   |
| Total                     | 95, 44.81% <sup>1</sup>  | 1                        | 94                       | 3 (3)                                | 10                      | 0        | 10                      | 52                       | 1                       | 51                       | 9 (8)                               | 0        | 9       | 28                       | 0                           | -                | -             |   |
| B genome <i>B. juncea</i> | B01                      | 6                        | 0                        | 6                                    | 0                       | 0        | 0                       | 4                        | 0                       | 4                        | 0                                   | 0        | 0       | 0                        | 0                           | ✓                | ✓             |   |
|                           | B02                      | 10                       | 0                        | 10                                   | 0                       | 0        | 0                       | 4                        | 0                       | 4                        | 0                                   | 0        | 0       | 0                        | 0                           | ✓                | ✓             |   |
|                           | B03                      | 19                       | 1                        | 18                                   | 1 (1)                   | 3        | 0                       | 3                        | 11                      | 1                        | 10                                  | 3 (2)    | 0       | 3                        | 6                           | 4                | ✓             | ✓ |
|                           | B04                      | 23                       | 0                        | 23                                   | 1 (1)                   | 5        | 0                       | 5                        | 11                      | 0                        | 11                                  | 5 (4)    | 0       | 5                        | 12                          | 0                | ✓             | ✓ |
|                           | B05                      | 18                       | 0                        | 18                                   | 1 (1)                   | 4        | 0                       | 4                        | 9                       | 0                        | 9                                   | 3 (2)    | 0       | 3                        | 2                           | 0                | ✓             | ✓ |
|                           | B06                      | 11                       | 0                        | 11                                   | 1                       | 3        | 0                       | 3                        | 8                       | 0                        | 8                                   | 2        | 0       | 2                        | 2                           | 0                | ✓             | ✓ |
|                           | B07                      | 16                       | 0                        | 16                                   | 0                       | 0        | 0                       | 10                       | 0                       | 10                       | 0                                   | 0        | 0       | 2                        | 0                           | ✓                | ✓             |   |
|                           | B08                      | 14                       | 0                        | 14                                   | 0                       | 0        | 0                       | 3                        | 0                       | 3                        | 0                                   | 0        | 0       | 0                        | 0                           | ✓                | ✓             |   |
|                           | Total                    | 117, 55.19% <sup>1</sup> | 1                        | 116                                  | 4 (3)                   | 15       | 0                       | 15                       | 60                      | 1                        | 59                                  | 13 (8)   | 0       | 13                       | 24                          | 4                | -             | - |
| Total mapped RLP genes    | 212, 92.98% <sup>4</sup> | 2, 0.94% <sup>1</sup>    | 210, 99.06% <sup>1</sup> | 7 (6)                                | 25, 11.79% <sup>1</sup> | 0        | 25, 11.90% <sup>3</sup> | 112, 52.83% <sup>1</sup> | 2, 100.00% <sup>2</sup> | 110, 52.38% <sup>3</sup> | 22 (16)                             | 0        | 22      | 52                       | 4                           | -                | -             |   |
| Unassigned                | 16, 7.02% <sup>4</sup>   | 0                        | 16                       | -                                    | -                       | -        | -                       | -                        | -                       | -                        | -                                   | -        | -       | -                        | -                           | -                | -             |   |
| Total                     | 228                      | 2, 0.88% <sup>4</sup>    | 226, 99.12% <sup>4</sup> | -                                    | -                       | -        | -                       | -                        | -                       | -                        | -                                   | -        | -       | -                        | -                           | -                | -             |   |

<sup>1</sup> The proportion in all mapped RLP genes. <sup>2</sup> The proportion in all mapped LysM-RLP genes. <sup>3</sup> The proportion in all mapped LRR-RLP genes. <sup>4</sup> The proportion in all RLP genes.
